# Supplementary material
Source: PubMed Central journal article supplement (PMC6393180)
Supplement: NIHMS1517934-supplement-Major_Resorces.pdf [file NIHMS1517934-supplement-Major_Resorces.pdf]

## Major Resources Tables

### Animals (in vivo studies)

| Species                                                  | Vendor or Source       | Background Strain | Sex  |
|----------------------------------------------------------|------------------------|-------------------|------|
| WT mice                                                  | The Jackson Laboratory | C57BL/6J          | male |
| PI3K $\gamma^{-/-}$ mice                                 | Josef M. Penninger     | C57BL/6J          | male |
| WT to WT chimeric mice                                   | Investigator generated | C57BL/6J          | male |
| WT to PI3K $\gamma^{-/-}$ chimeric mice                  | Investigator generated | C57BL/6J          | male |
| PI3K $\gamma^{-/-}$ to WT chimeric mice                  | Investigator generated | C57BL/6J          | male |
| PI3K $\gamma^{-/-}$ to PI3K $\gamma^{-/-}$ chimeric mice | Investigator generated | C57BL/6J          | male |

WT, wild type    PI3K $\gamma^{-/-}$ , PI3K-p110 $\gamma$  knockout

### Animal breeding

|                        | Species                  | Vendor or Source   | Background Strain | Other Information                                          |
|------------------------|--------------------------|--------------------|-------------------|------------------------------------------------------------|
| <b>Parent - Male</b>   | PI3K $\gamma^{-/-}$ mice | Josef M. Penninger | C57BL/6J          | backcrossed onto a C57BL/6 background for > 10 generations |
| <b>Parent - Female</b> | PI3K $\gamma^{-/-}$ mice | Josef M. Penninger | C57BL/6J          | backcrossed onto a C57BL/6 background for > 10 generations |

### Reagents

| Name                     | Vendor or Source                    | Catlog #     |
|--------------------------|-------------------------------------|--------------|
| Fetal bovine serum (FBS) | Life Technology (Grand Island, USA) | 10099-141    |
| DMEM/F12                 | Life Technology (Grand Island, USA) | C11330500BT  |
| AS605240                 | Sigma-Aldrich (St. Louis, USA)      | A0233        |
| Lipofectamine 3000       | Invitrogen(Carlsbad, CA, USA)       | P/N100022050 |

|                                               |                                 |          |
|-----------------------------------------------|---------------------------------|----------|
| Cell Counting Kit-8 (CCK-8)                   | Dojindo (Kumamoto, Japan)       | CK04     |
| BrdU Labeling and Detection kit               | Biovision (California, USA)     | K306-200 |
| PI3K activity ELISA kit                       | Echelon Biosciences (Utah, USA) | K-1000   |
| PrimeScript RT Master Mix kit                 | Takara (Dalian, China)          | RR036A-1 |
| SYBR Premix Ex Taq kit                        | Takara (Dalian, China)          | RR420A   |
| SimpleCHIP ® Plus Sonication Chromatin IP kit | CST (Danvers, USA)              | 56383    |
| dual-luciferase reporter kit                  | Promega (Madison, WI)           | E2920    |

### Antibodies

| Target antigen     | Vendor or Source                               | Catlog # | Working concentration, ug/ml        | Lot # (preferred but not required) |
|--------------------|------------------------------------------------|----------|-------------------------------------|------------------------------------|
| PI3K p110 $\alpha$ | CST (Danvers, USA)                             | 4249     | 0.1 (WB)                            |                                    |
| PI3K p110 $\beta$  | Abcam (Cambridge, UK)                          | Ab151549 | 0.2 (WB)                            |                                    |
| PI3K p110 $\gamma$ | Santa Cruz Biotechnology (Santa Cruz, CA, USA) | Sc-7177  | 1.0 (WB)<br>4.0 (IHC)<br>4.0 (IP)   |                                    |
| PI3K p110 $\delta$ | CST (Danvers, USA)                             | 34050    | 0.1 (WB)                            |                                    |
| PI3K p101          | CST (Danvers, USA)                             | 5569     | 0.1 (WB)                            |                                    |
| Akt (pan)          | CST (Danvers, USA)                             | 4685     | 0.1 (WB)                            |                                    |
| p-Akt (Ser473)     | CST (Danvers, USA)                             | 4060     | 0.1 (WB)<br>2.0 (IHC)               |                                    |
| YAP                | CST (Danvers, USA)                             | 14074    | 0.1 (WB)<br>2.0 (IHC)               |                                    |
| p-YAP(Ser127)      | CST (Danvers, USA)                             | 13008    | 0.1 (WB)<br>2.0 (IHC)               |                                    |
| CREB               | CST (Danvers, USA)                             | 9197     | 0.1 (WB)<br>2.0 (IHC)<br>4.0 (CHIP) |                                    |
| p-CREB (Ser133)    | CST (Danvers, USA)                             | 9198     | 0.1 (WB)<br>2.0 (IHC)<br>4.0 (CHIP) |                                    |
| SRF                | CST (Danvers, USA)                             | 5147     | 0.1 (WB)                            |                                    |
| Calponin           | Abcam (Cambridge, UK)                          | ab46794  | 0.1(WB)<br>1.0 (IF)                 |                                    |

|                |                       |         |                      |  |
|----------------|-----------------------|---------|----------------------|--|
| SM22 $\alpha$  | Abcam (Cambridge, UK) | ab14106 | 1.0 (WB)<br>5.0 (IF) |  |
| Ki-67          | Abcam (Cambridge, UK) | Ab15580 | 5.0 (IHC)            |  |
| IgG            | CST (Danvers, USA)    | 3900    | 4.0 (IHC)            |  |
| $\beta$ -actin | Boster (Wuhan, China) | BM0627  | 0.4 (WB)             |  |
| Histone H3     | Boster (Wuhan,China)  | BM4715  | 1.0 (WB)             |  |

p-Akt (Ser473), Phospho-Akt (Ser473); p-YAP (Ser127), Phospho-yes-associated protein(Ser127); p-CREB (Ser133), Phospho- cyclic AMP-response element binding protein (Ser133); SRF, Serum response factor; SM22 $\alpha$ , SM22 alpha;  $\beta$ -actin, beta actin; WB - Western blotting; IF - immunofluorescence; IHC - Immunohistochemistry; IP – Immunoprecipitation; Chip - Chromatin IP; CST, Cell signaling technology.

### Cultured Cells

| Name                                     | Vendor or Source       | Sex (F, M, or unknown) |
|------------------------------------------|------------------------|------------------------|
| Aortic SMC from WT mice                  | Investigator generated | male                   |
| Aortic SMC from PI3K $\gamma^{-/-}$ mice | Investigator generated | male                   |
